# Supplementary material for: Isatin N-phenylsemicarbazone: effect of substituents and concentration on anion sensing selectivity and sensitivity
Source: Royal Society of Chemistry journal article supplement (doi:10.1039/c4ra04847d), 2014-10-17
Supplement: c4ra04847d1.pdf [file c4ra04847d1.pdf]

## Electronic Supplementary Information (ESI)

### **Isatin *N*-phenylsemicarbazone: Effect of substituent and concentration on anion sensing selectivity and sensitivity**

Marek Cigán<sup>a,\*</sup>, Klaudia Jakusová<sup>a</sup>, Jana Donovalová<sup>a</sup>, Vojtech Szöcs<sup>a</sup> and Anton Gáplovský<sup>a</sup>

<sup>a</sup> *Faculty of Natural Sciences, Institute of Chemistry, Comenius University, Mlynská dolina CH-2, SK-842 15 Bratislava, Slovakia; E-Mails: jakusova@fns.uniba.sk (K.J.); cigan@fns.uniba.sk (M.C.); donovalova@fns.uniba.sk (J.D.); szocs@fns.uniba.sk (V.S.); gaplovsky@fns.uniba.sk (A.G.)*

\* cigan@fns.uniba.sk

## EXPERIMENTAL SECTION – Supporting information

### Synthesis

(*E*)-isatin-3-(4-phenyl)semicarbazone **Ia**:

Synthesis of the unsubstituted **Ia** *E*-isomer was published by Jakusová *et al.*, 2013.<sup>27</sup>

(*E*)-isatin-3-[4-(4-fluorophenyl)semicarbazone] **IIIa**:

Obtained from 4-(4-fluorophenyl)semicarbazide (0.27g) in 83% yield (0.4g),

<sup>1</sup>H NMR (300 MHz, DMSO-*d*<sub>6</sub>) δ: 10.77 (s, 1H), 10.41 (s, 1H), 9.54 (s, 1H), 8.08 (d, *J* = 7.6 Hz, 1H), 7.66 – 7.55 (m, 2H), 7.38 (ddd, *J* = 7.7, 0.9 Hz, 1H), 7.25 – 7.13 (m, 2H), 7.09 (ddd, *J* = 7.7, 0.8 Hz, 1H), 6.92 (d, *J* = 7.7 Hz, 1H).

<sup>13</sup>C NMR (75 MHz, DMSO-*d*<sub>6</sub>) δ: 164.72, 159.57, 156.39, 152.46, 143.11, 134.90, 131.98, 125.25, 121.61, 121.22, 121.12, 115.56, 115.26, 110.53.

Anal. Calcd. for C<sub>15</sub>H<sub>11</sub>FN<sub>4</sub>O<sub>2</sub> (298.27) C, 60.40; H, 3.72; N, 18.78. Found C, 58.15; H, 4.19; N, 17.13.

(*E*)-isatin-3-[4-(4-bromophenyl)semicarbazone] **IVa**:

Obtained from 4-(4-bromophenyl)semicarbazide (0.16g) in 88% yield (0.22g),

<sup>1</sup>H NMR (DMSO-*d*<sub>6</sub>) δ: 6.92 (d, 1H, *J*=7.7Hz, ArH), 7.06 – 7.12 (dt, 1H, *J*=0.9Hz, *J*=7.7Hz, ArH), 7.36 – 7.41 (dt, 1H, *J*=0.9Hz, *J*=7.7Hz, ArH), 7.51 – 7.60 (m, 4H, ArH), 8.08 (d, 1H, *J*=7.6Hz, ArH), 9.64 (s, 1H, NH), 10.43 (s, 1H, NH), 10.77 (s, 1H, NH).

<sup>13</sup>C NMR (75 MHz, DMSO-*d*<sub>6</sub>) δ: 164.55, 152.19, 143.02, 137.92, 134.89, 131.90, 131.52, 125.15, 121.48, 121.03, 115.45, 114.42, 110.41.

Anal. Calcd. for C<sub>15</sub>H<sub>11</sub>BrN<sub>4</sub>O<sub>2</sub> (359.18) C, 50.16; H, 3.09; N, 15.60. Found C, 50.40; H, 3.05; N, 15.43.

(*E*)-isatin-3-[4-(4-trifluoromethylphenyl)semicarbazone] **Va**:

Obtained from 4-(4-trifluoromethylphenyl)semicarbazide (0.22g) in 100% yield (0.35g),

<sup>1</sup>H NMR (DMSO-*d*<sub>6</sub>) δ: 6.92 (d, 1H, *J*=7.7Hz, ArH), 7.07 - 7.10 (dt, 1H, *J*=0.8Hz, *J*=7.7Hz, ArH), 7.37 - 7.42 (dd, 1H, *J*=4.3Hz, *J*=11.2Hz, ArH), 7.70 – 7.83 (dd, 1H, *J*=8.7Hz, *J*=31.9Hz, ArH), 8.08 – 8.10 (d, 1H, *J*=7.6Hz, ArH), 9.90 (s, 1H, NH), 10.50 (s, 1H, NH), 10.79 (s, 1H, NH).

<sup>13</sup>C NMR (75 MHz, DMSO-*d*<sub>6</sub>) δ: 164.73, 152.35, 143.35, 142.44, 135.71, 132.26, 126.28, 125.45, 123.19, 122.76, 121.72, 119.05, 115.59, 110.68.

Anal. Calcd. for C<sub>16</sub>H<sub>11</sub>F<sub>3</sub>N<sub>4</sub>O<sub>2</sub> (348.28) C, 55.18; H, 3.18; N, 16.09. Found C, 53.58; H, 3.27; N, 15.65.

(*E*)-isatin-3-[4-(4-cyanophenyl)semicarbazone] **VIa**:

Obtained from 4-(4-cyanophenyl)semicarbazide (0.19g) in 71% yield (0.24g),

<sup>1</sup>H NMR (300 MHz, DMSO-*d*<sub>6</sub>) δ: 10.80 (s, 1H), 10.54 (s, 1H), 10.00 (s, 1H), 8.08 (d, *J* = 7.6 Hz, 1H), 7.80 (s, 4H), 7.40 (td, *J* = 7.8, 0.9 Hz, 1H), 7.10 (td, *J* = 7.7, 0.9 Hz, 1H), 6.92 (d, *J* = 7.6 Hz, 1H).

<sup>13</sup>C NMR (75 MHz, DMSO-*d*<sub>6</sub>) δ: 165.89, 153.50, 144.57, 144.38, 137.18, 134.62, 133.51, 126.68, 122.91, 120.38, 116.75, 111.88, 105.80.

Anal. Calcd. for C<sub>16</sub>H<sub>11</sub>N<sub>5</sub>O<sub>2</sub> (305.29) C, 62.95; H, 3.63; N, 22.94. Found C, 63.01; H, 3.60; N, 22.87.

*(E)*-isatin-3-[4-(4-methylphenyl)semicarbazone] **VIIa**:

Obtained from 4-(4-methylphenyl)semicarbazide (0.28g) in 86% yield 0.43g),

<sup>1</sup>H NMR (300 MHz, DMSO-*d*<sub>6</sub>) δ: 10.76 (s, 1H), 10.37 (s, 1H), 9.39 (s, 1H), 8.09 (d, *J* = 7.6 Hz, 1H), 7.46 (d, *J* = 8.4 Hz, 2H), 7.38 (ddd, *J* = 7.7, 1.0 Hz, 1H), 7.15 (d, *J* = 8.2 Hz, 2H), 7.09 (ddd, *J* = 7.7, 0.9 Hz, 1H), 6.92 (d, *J* = 7.7 Hz, 1H), 2.27 (s, 3H).

<sup>13</sup>C NMR (75 MHz, DMSO-*d*<sub>6</sub>) δ: 164.59, 151.98, 142.94, 135.81, 134.50, 131.80, 129.17, 125.03, 121.46, 119.09, 115.48, 110.39, 20.30.

Anal. Calcd. for C<sub>16</sub>H<sub>14</sub>N<sub>4</sub>O<sub>2</sub> (294.31) C, 65.30; H, 4.79; N, 19.04. Found C, 64.97; H, 4.92; N, 18.60.

*(E)*-isatin-3-[4-(4-trimethoxyphenyl)semicarbazone] **VIIIa**:

Obtained from 4-(4-trimethoxyphenyl)semicarbazide (0.23g) in 51% yield (0.19g),

<sup>1</sup>H NMR (DMSO-*d*<sub>6</sub>) δ: 3.47 (s, 3H, OCH<sub>3</sub>), 6.90 – 6.94 (m, 3H, ArH), 7.06 – 7.11 (dt, 1H, *J* = 0.9 Hz, *J* = 7.6 Hz, ArH), 7.35 – 7.40 (dt, 1H, *J* = 1.0 Hz, *J* = 7.8 Hz, ArH), 7.49 (m, 2H, ArH), 8.09 (d, 1H, *J* = 7.6 Hz, ArH), 9.35 (s, 1H, NH), 10.36 (s, 1H, NH), 10.84 (s, 1H, NH).

<sup>13</sup>C NMR (75 MHz, DMSO-*d*<sub>6</sub>) δ: 164.02, 154.56, 141.25, 131.13, 124.67, 121.40, 120.83, 112.88, 107.96, 50.31.

Anal. Calcd. for C<sub>16</sub>H<sub>14</sub>N<sub>4</sub>O<sub>3</sub> (310.31) C, 61.93; H, 4.55; N, 18.06. Found C, 58.04; H, 4.57; N, 17.91.

*(E)*-5-bromo-1-isatin-3-(4-phenyl)semicarbazone **IXa**:

Obtained from 4-phenylsemicarbazide (1g) in 43% yield (1.02g),

<sup>1</sup>H NMR (600 MHz, DMSO-*d*<sub>6</sub>) δ: 10.90 (s, 1H), 10.63 (s, 1H), 9.50 (d, *J* = 19.5 Hz, 1H), 8.36 (d, *J* = 1.8 Hz, 1H), 7.60 (dd, *J* = 8.6, 1.0 Hz, 2H), 7.55 (dd, *J* = 8.3, 1.9 Hz, 1H), 7.38 – 7.33 (m, 2H), 7.08 (tt, *J* = 7.5, 1.1 Hz, 1H), 6.88 (d, *J* = 8.3 Hz, 1H).

<sup>13</sup>C NMR (75 MHz, DMSO-*d*<sub>6</sub>) δ: 164.41, 152.06, 142.15, 138.37, 134.07, 133.17, 128.90, 127.36, 123.13, 119.32, 117.25, 113.40, 112.32.

Anal. Calcd. for C<sub>15</sub>H<sub>11</sub>BrN<sub>4</sub>O<sub>2</sub> (359.18) C, 50.16; H, 3.09; N, 15.60. Found C, 50.28; H, 3.11; N, 15.72.

*(E)*-5-trifluoromethoxyisatin-3-(4-phenyl)semicarbazone **Xa**:

Obtained from 4-phenylsemicarbazide (0.13g) in 100% yield 0.31g),

$^1\text{H}$  NMR (300 MHz, DMSO- $d_6$ )  $\delta$  10.97 (s), 10.73 (s), 9.47 (s), 8.24 (d,  $J = 1.7$  Hz), 7.60 (d,  $J = 7.6$  Hz), 7.46 – 7.30 (m), 7.08 (t,  $J = 7.4$  Hz), 6.99 (d,  $J = 8.6$  Hz).

$^{13}\text{C}$  NMR (75 MHz, DMSO- $d_6$ )  $\delta$  162.60, 151.01, 140.46, 138.22, 128.76, 128.66, 123.44, 123.21, 121.58, 119.69, 113.68, 111.87.

Anal. Calcd. for  $\text{C}_{16}\text{H}_{11}\text{F}_3\text{N}_4\text{O}_3$  (364.28) C, 52.75; H, 3.04; N, 15.38. Found C, 51.96; H, 3.06; N, 15.2.

(*Z*)-5-trifluoromethoxyisatin-3-(4-phenyl)semicarbazone **Xb**:

Obtained from reaction mixture of **Xa** (0.08g) by column chromatography in 50% yield 0.04g),

$^1\text{H}$  NMR (300 MHz, DMSO- $d_6$ )  $\delta$  12.15 (s), 11.36 (s), 9.86 (s), 7.68 (d,  $J = 1.5$  Hz), 7.63 (dd,  $J = 8.6$ , 1.1 Hz), 7.40 – 7.30 (m), 7.09 (s), 7.03 (d,  $J = 8.6$  Hz).

$^{13}\text{C}$  NMR (75 MHz, DMSO- $d_6$ )  $\delta$  162.60, 151.01, 143.40, 140.46, 138.22, 131.30, 128.66, 123.45, 123.21, 121.57, 119.69, 113.69, 111.87.

Anal. Calcd. for  $\text{C}_{16}\text{H}_{11}\text{F}_3\text{N}_4\text{O}_3$  (364.28) C, 52.75; H, 3.04; N, 15.38. Found C, 51.96; H, 3.06; N, 15.2.

(*E*)-5-methyl-1-isatin-3-(4-phenyl)semicarbazone **XIa**:

Obtained from 4-phenylsemicarbazide (0.47g) in 73% yield (0.67g),

$^1\text{H}$  NMR (DMSO- $d_6$ ),  $\delta$ : 2.34 (s, 3H, CH<sub>3</sub>) 6.81 (d, 1H,  $J=7.9$ Hz, ArH), 7.05 – 7.09 (m, 1H, ArH), 7.18 – 7.21 (dd, 1H,  $J=0.7$ Hz,  $J=7.9$ Hz, ArH), 7.32 – 7.38 (m, 2H, ArH), 7.58 – 7.61 (dd, 2H,  $J=1.1$ Hz,  $J=8.6$ Hz, ArH), 7.96 (s, 1H, ArH), 9.41 (s, 1H, NH), 10.40 (s, 1H, NH), 10.66 (s, 1H, NH).

$^{13}\text{C}$  NMR (75 MHz, DMSO- $d_6$ )  $\delta$ : 164.64 (s), 152.21 (s), 140.71 (s), 138.35 (s), 134.78 (s), 132.13 (s), 130.45 (s), 128.75 (s), 125.58 (s), 122.90 (s), 119.17 (s), 115.55 (s), 110.09 (s), 20.52 (s).

Anal. Calcd. for  $\text{C}_{16}\text{H}_{14}\text{N}_4\text{O}_2$  (294.31) C, 65.30; H, 4.79; N, 19.04. Found C, 65.32; H, 4.90; N, 18.58.

## Titration experiments

### Association constant determinations

Equation (1) was rewritten to the following form for nonlinear fit:

$$A = A_0 + c_1 * (P1 - A_0) * (c_0 + x + 1/P2 - \sqrt{(c_0 + x + 1/P2)^2 - 4 * c_0 * x}), \quad (2)$$

where:  $c_0 = 1 \times 10^{-4}$  or  $1 \times 10^{-5}$ ,  $c_1 = 1/2c_0 = 5 \times 10^3$  or  $5 \times 10^4$ , parameter  $P1 = A_{lim}$ , parameter  $P2 = K_{ass}$  and  $x = c_{A^-}$ . The  $A_0$  value was fixed to the absorbance value  $A$  for  $x = 0$ . The large difference in constants  $c_0$ ,  $c_1$  and the  $x$ -data range led rescaling the nonlinear function ( $x$  and fitted parameter  $1/P2$  by a factor of  $10^4$ ). Following this modification, the standard non-linear least-squares Nelder-Mead minimization method was employed to determine fitting parameters  $P1$  and  $P2$ .<sup>28</sup> Four different wavelengths (425nm, 410 nm, 390 nm and 330 nm) were used to  $K_{ass}$  determination.

Where the titration curve and Job's plot indicated sensor:anion 2:1 stoichiometry, the  $K_{ass}$  value was determined by the hyperbolic equation:<sup>25</sup>

$$\Delta A = \frac{\Delta A_{\infty} K_{ass} [S]^2}{1 + K_{ass} [S]^2}, \quad (3)$$

where  $\Delta A$  is the change in sensor absorbance following addition of a constant amount of anion to the sensor solution compared to sensor solution absorbance without anion addition,  $\Delta A_{\infty}$  is the limit value for  $\Delta A = f([S]^2)$  dependence and  $[S]$  is the concentration of free sensor. Because the  $A = f(c_{A^-})$  titration curves for 2:1 complexes were obtained at low anion equivalent, the overall sensor concentration was taken as free sensor concentration in solution. Standard non-linear least-squares fitting approach in Mathematica 9.0 was used to determine fitting parameters  $\Delta A_{\infty}$  and  $K_{ass}$ .<sup>29</sup>

### Detection and quantification limits

Detection limit ( $3\sigma/S$ ) and quantification limit ( $10\sigma/S$ ) were determined by the following equations:

$$3\sigma/S = 3 \sqrt{\frac{\sum (A - \bar{A})^2}{n-1}} / S; \quad (4)$$

$$10\sigma/S = 10 \sqrt{\frac{\sum (A - \bar{A})^2}{n-1}} / S, \quad (5)$$

where:  $\sigma$  is the standard deviation,  $A$  is the sensor (isatin *N*-phenylsemicarbazone) absorbance and  $S$  is the slope of the  $A = f(c_{A^-})$  plot in the initial linear portion of the curve; in all cases  $n = 4$ .

## Light initiated *E-Z* isomerization

Quantum yield determination

The *E-Z* isomerization quantum yield ( $\Phi_{E-Z}$ ) of isatinphenylsemicarbazone *E*-isomers **IIIa-XIa** in DMF solution was determined by equations (6) and (7):

$$\Phi_{E-Z} = \frac{\int_0^{c_1} dc}{\int_0^t I_a dt} = \frac{\Delta c}{\int_0^t I_a dt}; \quad (6) \quad \Delta c = \frac{\Delta A_\lambda}{\varepsilon_{\lambda Z} - \varepsilon_{\lambda E}}, \quad (7)$$

where:  $\Delta c$  is the concentration change in *E*- or *Z*-isomer,  $I_a$  is *E*-isomer absorbed photon flux at the irradiation wavelength  $\lambda$  using a monochromatic light source,  $\Delta A_\lambda$  is the absorbance change at irradiation wavelength  $\lambda$  using a monochromatic light source,  $\varepsilon_{\lambda E}$  is *E*-isomer molar extinction coefficient at irradiation wavelength  $\lambda$  using a monochromatic light source,  $\varepsilon_{\lambda Z}$  is *Z*-isomer molar extinction coefficient of at irradiation wavelength  $\lambda$  using a monochromatic light source and  $t$  is irradiation time.

The *E*-isomer absorbed photon flux  $I_a$  at particular irradiation times during *E-Z* isomerization at irradiation wavelength  $\lambda = 405$  nm and incident *E*-isomer concentration  $c_0$  was calculated by Eq. (8):<sup>30</sup>

$$I_{a,405 E} = I_0 \frac{\varepsilon_{E,405}(c_0 - \Delta c)}{\varepsilon_{E,405}(c_0 - \Delta c) + \varepsilon_{Z,405}\Delta c} \left[ -10^{-[\varepsilon_{E,405}(c_0 - \Delta c) + \varepsilon_{Z,405}\Delta c]t} \right] \quad (8)$$

Neither photochemically nor thermally initiated back *Z-E* isomerization occurred during *Z*-isomer solution irradiation at 405 nm.<sup>15</sup>

The incident photon flux  $I_0$  was determined by 2-nitrobenzaldehyde (2-NB) as chemical actinometer, according to Eq. (9):<sup>31</sup>

$$I_0 = \frac{k}{2,303 \cdot \varepsilon_{o-NB,405} \cdot \Phi_{o-NB,405} \cdot l}, \quad (9)$$

where:  $\varepsilon_{o-NB,405}$  is the molar extinction coefficient of 2-NB at irradiation wavelength 405 nm,  $\Phi_{o-NB,405}$  is the quantum yield of 2-NB photodegradation at irradiation wavelength,  $l$  is the path length and  $k$  is the 2-NB first-order photodegradation slope plotted under low-light-absorbing conditions:<sup>31</sup>

$$\ln\left(\frac{[\rho - \text{NB}]_t}{[\rho - \text{NB}]_0}\right) = -kt. \quad (10)$$

## SUPPORTING SCHEMES, TABLES AND FIGURES

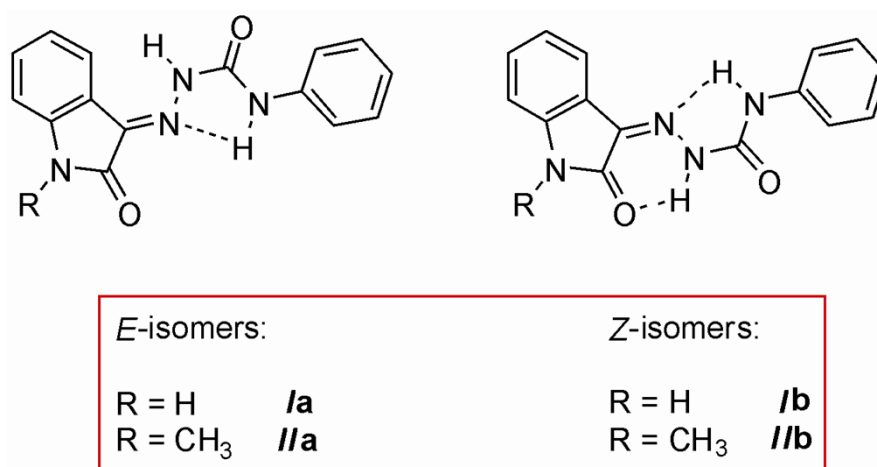

**Scheme S1.** Molecular structure of the previously studied isatin *N*-phenylsemicarbazones.

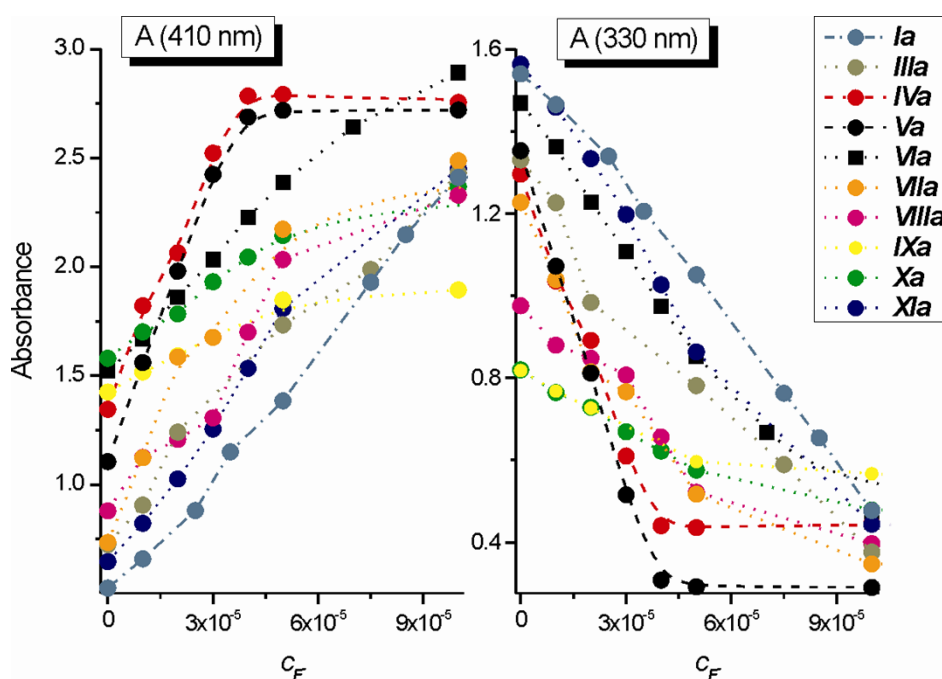

**Fig. S1.** Evolution of absorbance values at 330 nm and 410 nm for sensors *Ia* and *III-XIa* in DMF during *Ia-XIa* solution titration with  $TBA^+F^-$  ( $c_{\text{sensor}} = 1 \times 10^{-4} \text{ mol dm}^{-3}$ ).



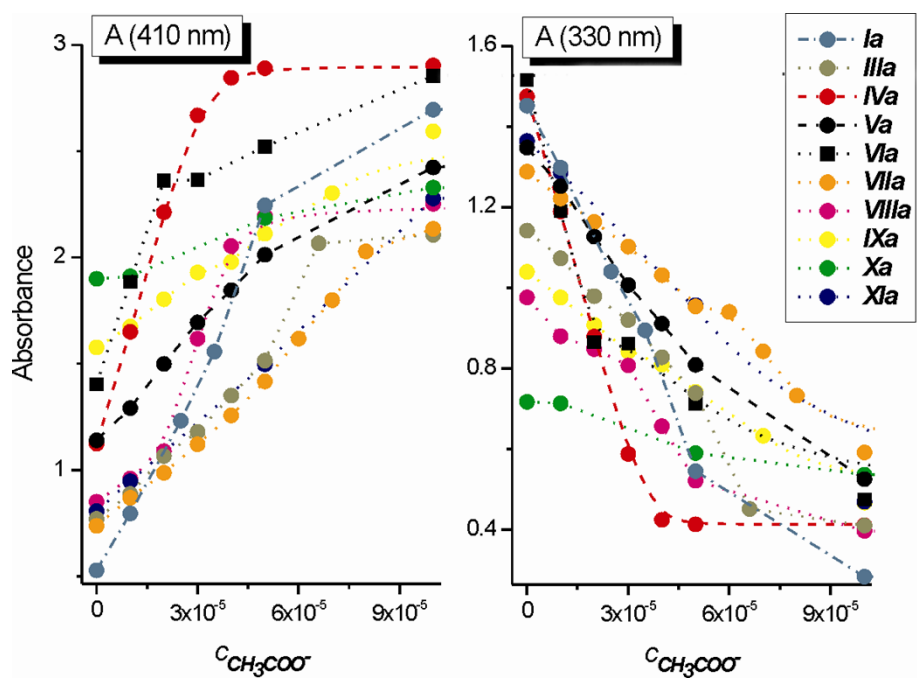

**Fig. S2.** Evolution of absorbance values at 330 nm and 410 nm for sensors *Ia* and *III-XIa* in DMF during *Ia-XIa* solution titration with  $TBA^+ CH_3COO^-$  ( $c_{\text{sensor}} = 1 \times 10^{-4}$  mol dm<sup>-3</sup>).

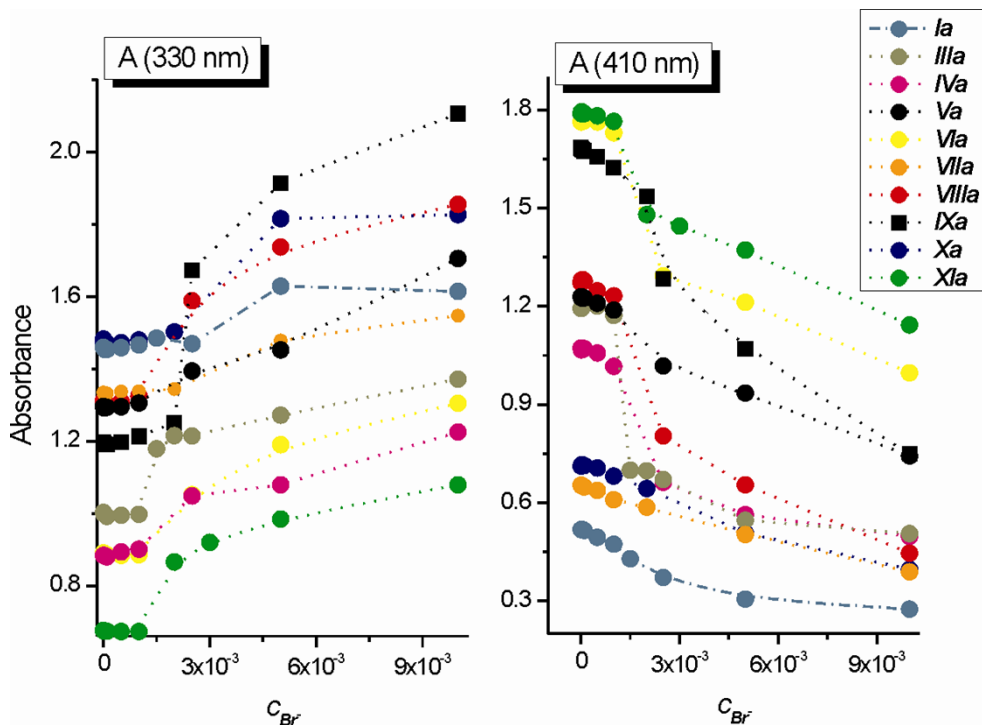

**Fig. S3.** Evolution of absorbance values at 330 nm and 410 nm for sensors *Ia* and *III-XIa* in DMF during *Ia-XIa* solution titration with  $TBA^+ Br^-$  ( $c_{\text{sensor}} = 1 \times 10^{-5}$  mol dm<sup>-3</sup>).

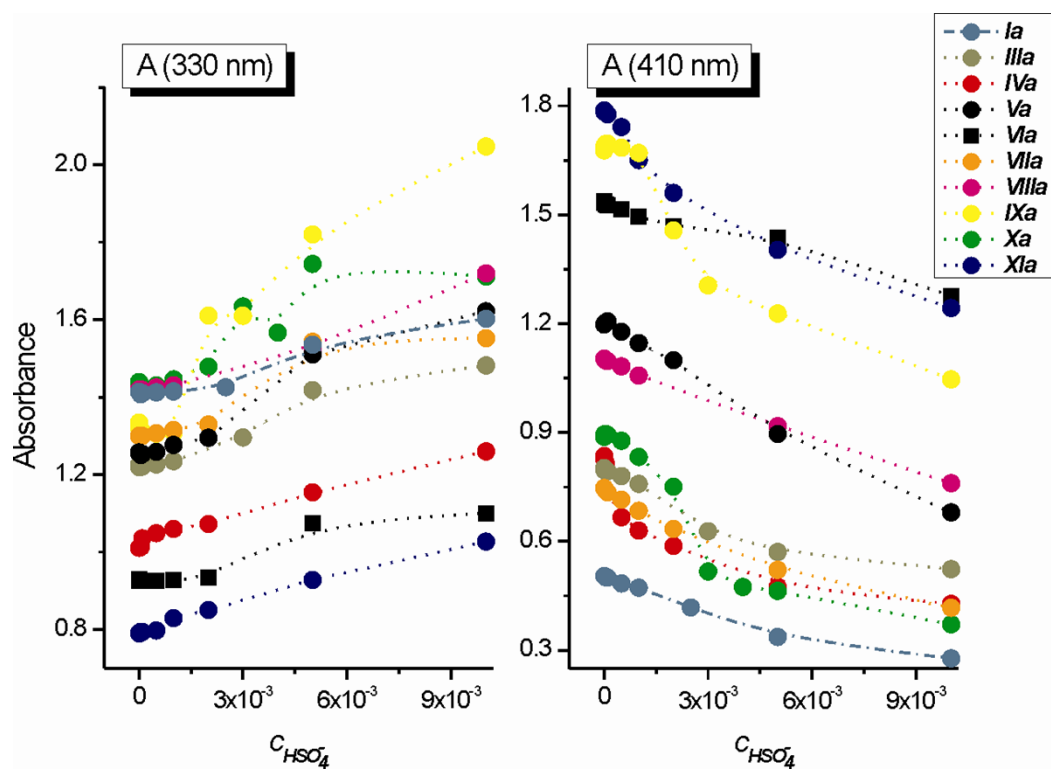

**Fig. S4.** Evolution of absorbance values at 330 nm and 410 nm for sensors *Ia* and *III-XIa* in DMF during *Ia-XIa* solution titration with  $TBA^+HSO_4^-$  ( $c_{\text{sensor}} = 1 \times 10^{-5} \text{ mol dm}^{-3}$ ).

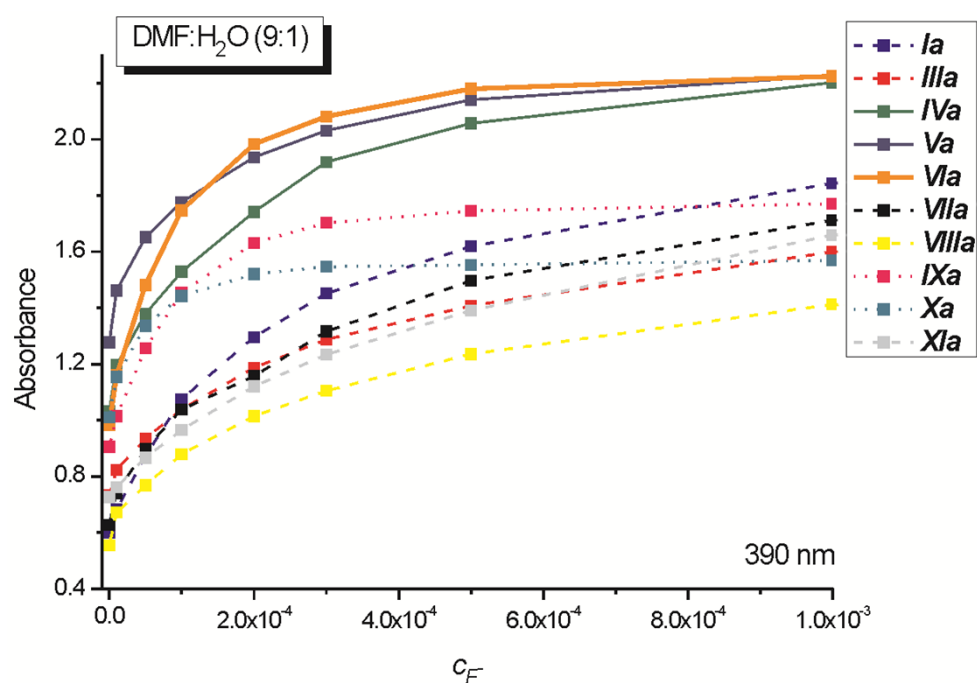

**Fig. S5.** Evolution of absorbance values at 330 nm and 410 nm for sensors *Ia* and *III-XIa* in DMF:H<sub>2</sub>O (9:1; v/v) solvent mixture during *Ia-XIa* solution titration with  $TBA^+F^-$  ( $c_{\text{sensor}} = 1 \times 10^{-4} \text{ mol dm}^{-3}$ ).

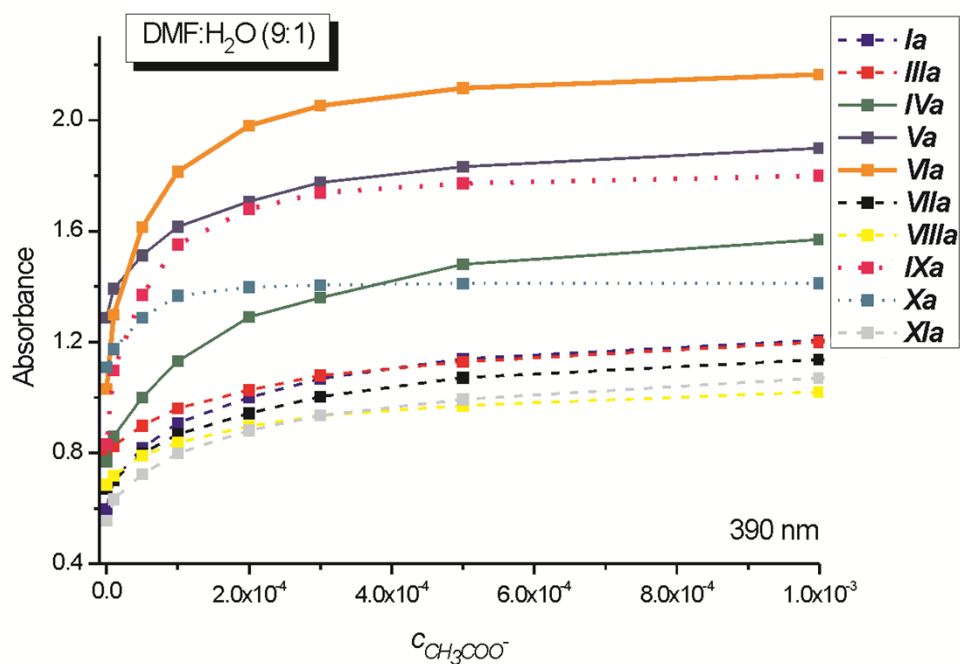

**Fig. S6.** Evolution of absorbance values at 330 nm and 410 nm for sensors *Ia* and *III-XIa* in DMF:H<sub>2</sub>O (9:1; v/v) solvent mixture during *Ia-XIa* solution titration with  $TBA^+ CH_3COO^-$  ( $c_{\text{sensor}} = 1 \times 10^{-4}$  mol dm<sup>-3</sup>).

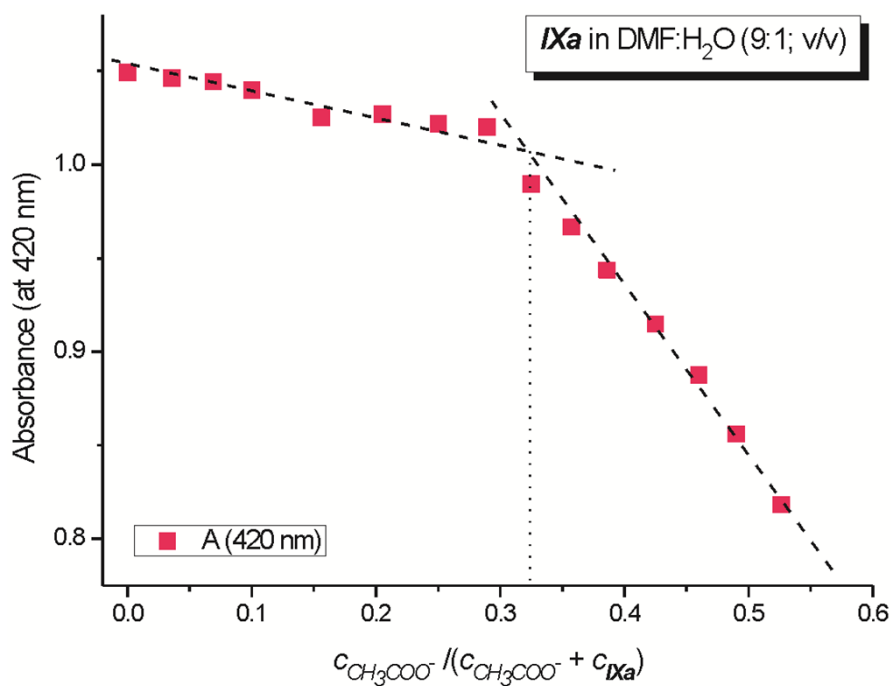

**Fig. S7.** Stoichiometric analysis of  $CH_3COO^-$  anion binding to sensor *IXa* – Job's plot.

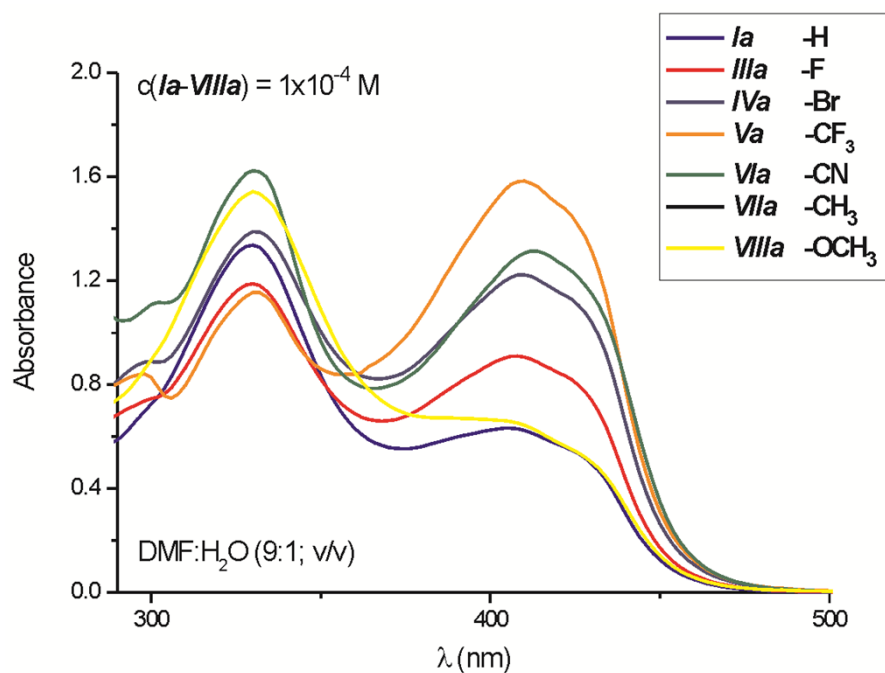

**Fig. S8.** UV-VIS spectra of isatin *N*-phenylsemicarbazone *E*-isomers *Ia*, *IIIa*, *IVa*, *Va* and *VIa* in DMF:H<sub>2</sub>O (9:1; v/v) solvent mixture ( $c_{\text{sensor}} = 1 \times 10^{-4} \text{ mol dm}^{-3}$ ;  $T = 298.16 \text{ K}$ ).

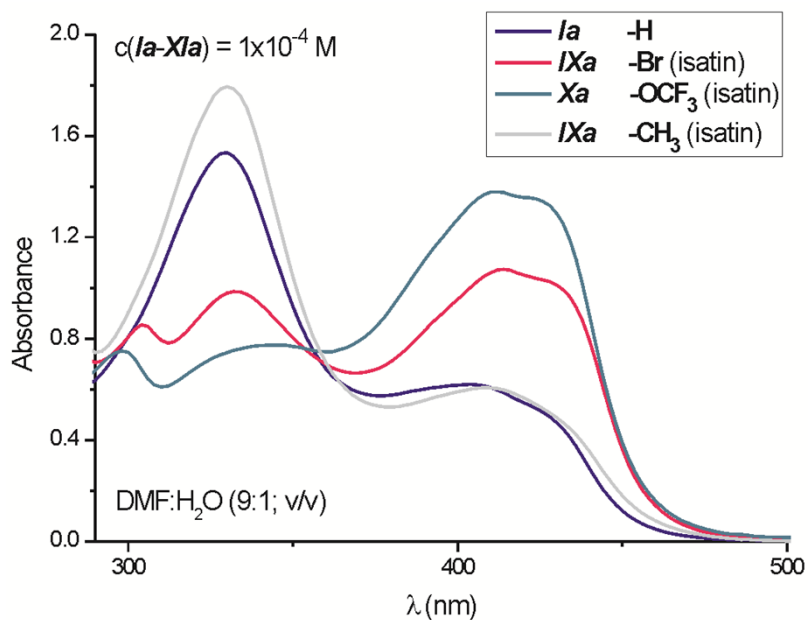

**Fig. S9.** UV-VIS spectra of isatin *N*-phenylsemicarbazone *E*-isomers *Ia*, *IXa*, *Xa* and *XIa* in DMF:H<sub>2</sub>O (9:1; v/v) solvent mixture ( $c_{\text{sensor}} = 1 \times 10^{-4} \text{ mol dm}^{-3}$ ;  $T = 298.16 \text{ K}$ ).

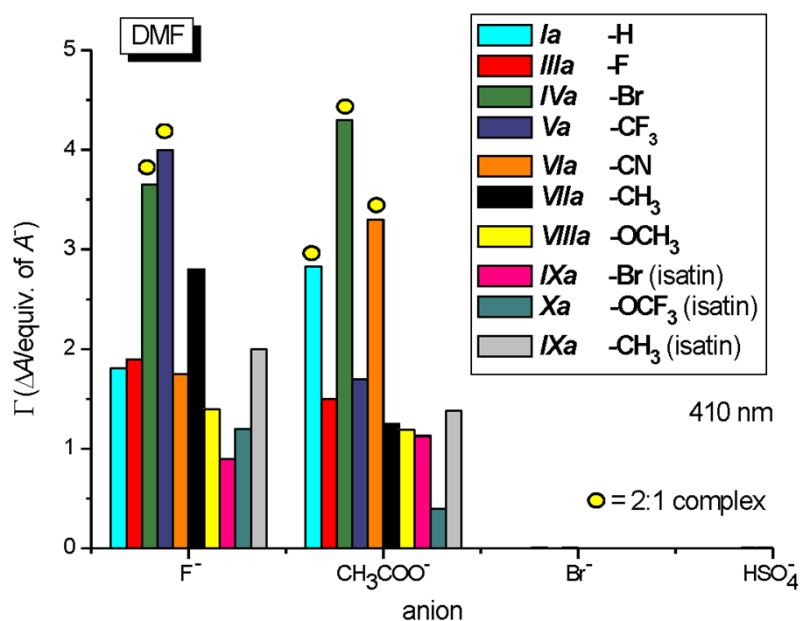

**Fig. S10.** The sensitivity  $\Gamma$  of the studied *E*-isomers of isatin *N*-phenylsemicarbazones **Ia** and **IIIa-XIa** at 410 nm for anions in DMF at 298.16 K ( $c_{E\text{-isomer}} = 1 \times 10^{-4} \text{ mol}^{-1} \text{ dm}^3$  for  $F^-$  and  $CH_3COO^-$  sensing and  $c_{E\text{-isomer}} = 1 \times 10^{-5} \text{ mol}^{-1} \text{ dm}^3$  for  $Br^-$  and  $HSO_4^-$  sensing). Parameter  $\Gamma$  defines  $A = f(c_A^-)$  slope at low anion concentration where sensor absorbance increase/decrease is clearly linear.

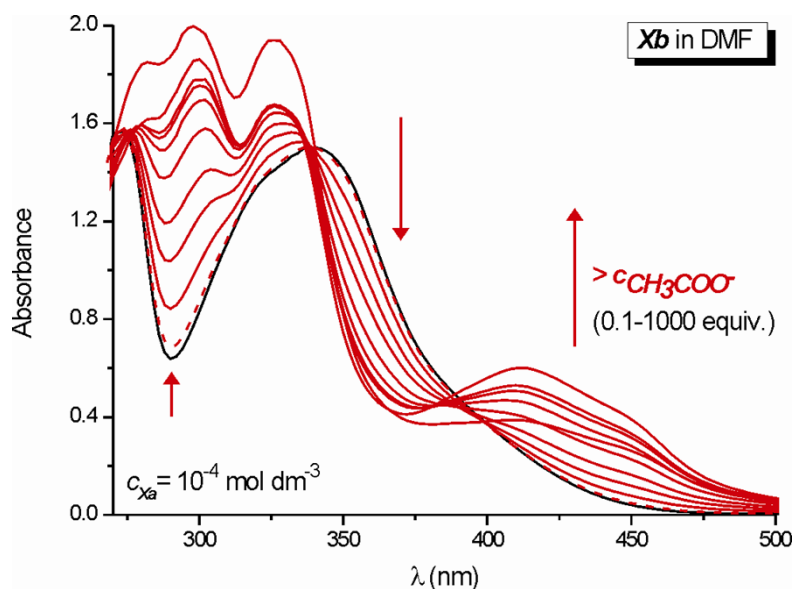

**Fig. S11.** Evolution of the UV-VIS spectrum of isatin *N*-phenylsemicarbazone *Z*-isomer **Xb** in DMF during **Xb** solution titration with  $TBA^+CH_3COO^-$  ( $c_{Ib} = 1 \times 10^{-4} \text{ mol dm}^{-3}$ ;  $c_{CH_3COO^-} = 0 \text{ mol dm}^{-3}$ ,  $1 \times 10^{-5} \text{ mol dm}^{-3}$ ,  $3 \times 10^{-5} \text{ mol dm}^{-3}$ ,  $5 \times 10^{-5} \text{ mol dm}^{-3}$ ,  $1 \times 10^{-4} \text{ mol dm}^{-3}$ ,  $2 \times 10^{-4} \text{ mol dm}^{-3}$ ,  $3 \times 10^{-4} \text{ mol dm}^{-3}$ ,  $4 \times 10^{-4} \text{ mol dm}^{-3}$ ,  $5 \times 10^{-4} \text{ mol dm}^{-3}$ ,  $1 \times 10^{-3} \text{ mol dm}^{-3}$  and  $1 \times 10^{-2} \text{ mol dm}^{-3}$ ).

**Table S1.** The *E-Z* isomerization quantum yield for isatin *N*-phenylsemicarbazones **Ia-IXa** and **XIa** in DMF at 298.16 K ( $c_{E\text{-isomer}} = 1 \times 10^{-4} \text{ mol}^{-1} \text{ dm}^3$ ).

| Compd        | $\Phi_{E-Z} \times 10^{-3}$ |
|--------------|-----------------------------|
| <b>Ia</b>    | $6.96 \pm 0.37$             |
| <b>IIIa</b>  | $2.56 \pm 0.16$             |
| <b>IVa</b>   | $2.20 \pm 0.12$             |
| <b>Va</b>    | $2.24 \pm 0.13$             |
| <b>VIa</b>   | $2.07 \pm 0.15$             |
| <b>VIIa</b>  | $3.08 \pm 0.14$             |
| <b>VIIIa</b> | $2.96 \pm 0.12$             |
| <b>IXa</b>   | $2.52 \pm 0.13$             |
| <b>XIa</b>   | $1.68 \pm 0.11$             |

$\Phi_{E-Z}$  – the *E-Z* isomerization quantum yield

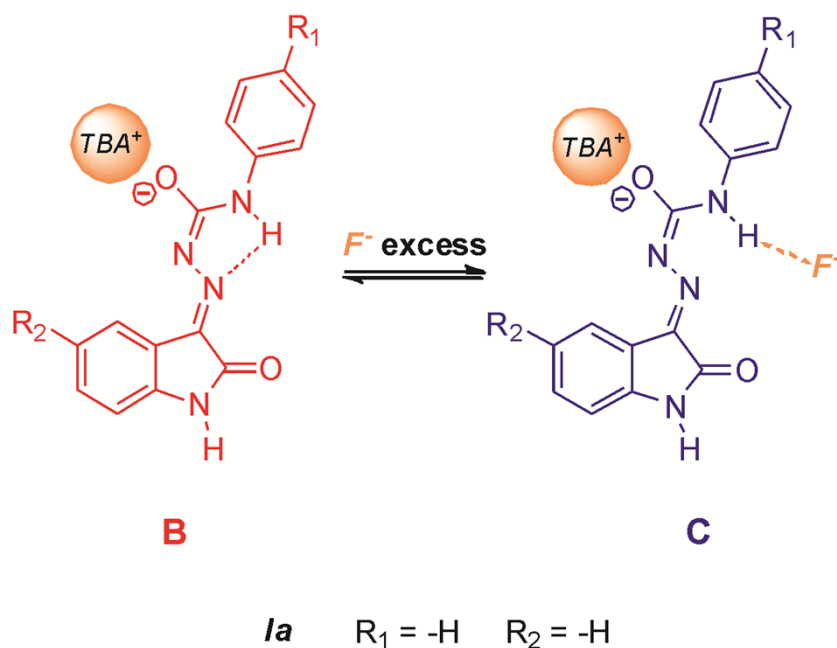

**Scheme S2.** The presumed non-covalent intermolecular interaction of derivative **Ia** with  $F^-$  anions during **Ia** solution titration with  $TBA^+F^-$  (self-associate hydrazone **A**/hydrazone **B**/hydrazone **C** equilibrium).

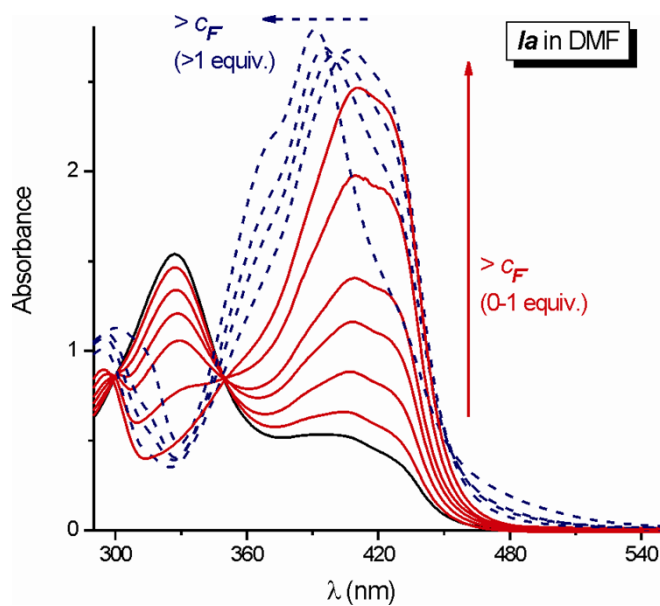

**Fig. S12.** Evolution of the UV-VIS spectrum of isatin *N*-phenylsemicarbazone *E*-isomer **Ia** in DMF during **Ia** solution titration with  $TBA^+F^-$  ( $c_{Ia} = 1 \times 10^{-4} \text{ mol dm}^{-3}$ ;  $c_{F^-} = 0 \text{ mol dm}^{-3}$ ,  $1 \times 10^{-5} \text{ mol dm}^{-3}$ ,  $2.5 \times 10^{-5} \text{ mol dm}^{-3}$ ,  $3.5 \times 10^{-5} \text{ mol dm}^{-3}$ ,  $5 \times 10^{-5} \text{ mol dm}^{-3}$ ,  $7.5 \times 10^{-5} \text{ mol dm}^{-3}$ ,  $1 \times 10^{-4} \text{ mol dm}^{-3}$ ,  $1 \times 10^{-3} \text{ mol dm}^{-3}$ ,  $5 \times 10^{-3}$ ,  $7.5 \times 10^{-3} \text{ mol dm}^{-3}$  and  $1 \times 10^{-2} \text{ mol dm}^{-3}$ ).

## ADDITIONAL REFERENCES

- [27] K. Jakusová, M. Gáplovský, J. Donovalová, M. Cigáň, H. Stankovičová, R. Sokolík, J. Gašpar, A. Gáplovský, Effect of reactants' concentration on the ratio and yield of *E,Z* isomers of isatin-3-(4-phenyl)semicarbazone and N-methylisatin-3-(4-phenyl)semicarbazone, *Chem. Pap.*, 2013, **67**, 117-126, <http://dx.doi.org/10.2478/s11696-012-0248-x>.
- [28] W.H. Press, S. Teukolsky, W. Vetterling, B. Flannery, Numerical Recipes: The Art of Scientific Computing, Cambridge University Press, New York, 2007.
- [29] Wolfram Research, Inc., Mathematica, Version 9.0, Champaign, IL, 2012.
- [30] P. Klán, J. Wirz, Spectrophotometric Determination of the Reaction Progress, in: J. Coxon, P. Bailey, L. Field, J.A. Gladysz, P. Parsons, P. Stang (Eds.), Photochemistry of Organic Compounds: From Concepts To Practice, John Wiley & Sons Ltd, 2009, Chichester, pp. 114-116.
- [31] E.S. Galbavy, K. Ram, C. Anastasio, 2-Nitrobenzaldehyde as a chemical actinometer for solution and ice photochemistry, *J. Photochem. Photobiol. A Chem.*, 2010, **209**, 186-192, <http://dx.doi.org/10.1016/j.jphotochem.2009.11.013>.
